# Supplementary material for: Dyspepsia among patients with chronic kidney disease: a cross sectional study
Source: PubMed Central journal article supplement (PMC4016304; doi:10.1186/1755-7682-6-43), 2013-10-20
Supplement: 1755-7682-6-43-S2.pdf [file 1755-7682-6-43-S2.pdf]

LEEDS SHORT FORM QUESTIONNAIRE

| Please answer both parts of each question                                                                                             |                                                                                   | A                                                                                                                                                                                                                                                                     | B                                                                                                                                                                                                                                                                     |
|---------------------------------------------------------------------------------------------------------------------------------------|-----------------------------------------------------------------------------------|-----------------------------------------------------------------------------------------------------------------------------------------------------------------------------------------------------------------------------------------------------------------------|-----------------------------------------------------------------------------------------------------------------------------------------------------------------------------------------------------------------------------------------------------------------------|
| Patient ID:                                                                                                                           |                                                                                   | <b>How often have you had this symptom over the last 2 months?</b>                                                                                                                                                                                                    | <b>How often has this symptom interfered with your normal activities (eating, sleeping, work, leisure) over the last 2 months?</b>                                                                                                                                    |
| Date:                                                                                                                                 |                                                                                   | Tick only one box per question.                                                                                                                                                                                                                                       | Tick only one box per question                                                                                                                                                                                                                                        |
| <b>1. Indigestion</b><br>Indigestion is a pain or discomfort in the upper abdomen.                                                    |  | <input type="checkbox"/> Not at all<br><input type="checkbox"/> Less than once a month<br><input type="checkbox"/> Between once a month and once a week<br><input type="checkbox"/> Between once a week and once a day<br><input type="checkbox"/> Once a day or more | <input type="checkbox"/> Not at all<br><input type="checkbox"/> Less than once a month<br><input type="checkbox"/> Between once a month and once a week<br><input type="checkbox"/> Between once a week and once a day<br><input type="checkbox"/> Once a day or more |
| <b>2. Heartburn</b><br>Heartburn is a burning feeling behind the breastbone.                                                          |  | <input type="checkbox"/> Not at all<br><input type="checkbox"/> Less than once a month<br><input type="checkbox"/> Between once a month and once a week<br><input type="checkbox"/> Between once a week and once a day<br><input type="checkbox"/> Once a day or more | <input type="checkbox"/> Not at all<br><input type="checkbox"/> Less than once a month<br><input type="checkbox"/> Between once a month and once a week<br><input type="checkbox"/> Between once a week and once a day<br><input type="checkbox"/> Once a day or more |
| <b>3. Regurgitation</b><br>Regurgitation is an acid taste coming up into your mouth from your stomach.                                |                                                                                   | <input type="checkbox"/> Not at all<br><input type="checkbox"/> Less than once a month<br><input type="checkbox"/> Between once a month and once a week<br><input type="checkbox"/> Between once a week and once a day<br><input type="checkbox"/> Once a day or more | <input type="checkbox"/> Not at all<br><input type="checkbox"/> Less than once a month<br><input type="checkbox"/> Between once a month and once a week<br><input type="checkbox"/> Between once a week and once a day<br><input type="checkbox"/> Once a day or more |
| <b>4. Nausea</b><br>Nausea is a feeling of sickness without actually being sick.                                                      |                                                                                   | <input type="checkbox"/> Not at all<br><input type="checkbox"/> Less than once a month<br><input type="checkbox"/> Between once a month and once a week<br><input type="checkbox"/> Between once a week and once a day<br><input type="checkbox"/> Once a day or more | <input type="checkbox"/> Not at all<br><input type="checkbox"/> Less than once a month<br><input type="checkbox"/> Between once a month and once a week<br><input type="checkbox"/> Between once a week and once a day<br><input type="checkbox"/> Once a day or more |
| <b>5. Which, if any, of these symptoms has been the most troublesome to you in the last 2 months?</b><br><br>Please tick one box only |                                                                                   | <input type="checkbox"/> Heartburn<br><input type="checkbox"/> Regurgitation<br><input type="checkbox"/> Indigestion<br><input type="checkbox"/> Nausea<br><input type="checkbox"/> None of these have troubled me                                                    |                                                                                                                                                                                                                                                                       |
